# Supplementary material for: Improving Headache Care through Specialized Education: A Cross-Sectional Global Perspective
Source: Research Square preprint supplement (doi:10.21203/rs.3.rs-7204741/v1), 2025-12-19
Supplement: Supplementary file 1 [file 236ac512074e1f34441b934a.docx]

Master of Headache Disorders

**Supplementary Materials**

| Your insights are valuable! We are conducting this survey to understand better how our graduates use their expertise in the field and improve the Master of Headache Disorders program for future generations. We sincerely appreciate you taking the time to share your experiences. We will keep all responses confidential. |
| --- |
| 1.Year of MHD graduations  2024  2022  2020  2018 |
| 2.Sex assigned at birth.  Female  Male  Prefer not to say.  3.Age (years)  18-25  25-34  35-44  45-54  55-64  65-74  Prefer not to say  4.Country of origin  5.In which country do you currently work?  6.What was the highest leve lof education you have completed before the master?  Bachelors degree (Skip to question 8)  Masters degree (Skip to question 8)  PhD (Skip to question 8)  Others (Skip to question 7)  7.If other, please kindly share additional. (Only is aplicable)  **Current Profession**  8.What is your current profession?  Neurologist still in training (Skip to question 10)  GP (Skip to question 10)  Neurologist (Skip to question 10)  Nurse (Skip to question 10)  Physiotherapist (Skip to question 10)  Odontologist (Skip to question 10)  Osteopath (Skip to question 10)  Neurosurgeon (Skip to question 10)  Pharmacologist (Skip to question 10)  Pharmacist (Skip to question 10)  Other or two professions (Skip to question 9)  9.If other or you have two professions, please kindly share additional details with us.  **Education**  10.Since graduating from the MHD, have you participares in any continuing education activities focused on headaches?  Yes  No  11.Do you teach or share information about headaches with others?  Yes (Skip to question 12)  No (Skip to question 14)  **Education regarding headaches**  Only if applicable  12.If your answer was "Yes," please specify to whom.  13.Please indicate the number of hours spent on education if applicable.  Once a year  Once a month  Once a week  More than once a week  Daily  **Workplace**  14.What type of organization is your current **workplace?**  Public Hospital (skip to question 16)  Private Hosptal/clinic (skip to question 16)  Other (skip to question 15)  15.If other, please kindly share additional details with us (only if aplicable)  **Current Role**  16. On average, how many headache patients do you evaluate per month in your current role?  None  1-10  10-30  30-50  More than 50  17. Did you work in headache clinic or service **before** the MHD?  Yes (skip to question 19)  No (skip to question 18)    18.Did you start working in a headache clinic or service **after** the MHD?  Yes (skip to question 19)  No (skip to question 19)  19.Did you establish a Headache service before the Master (clinical, department, telehealth)  Yes  No  20.Following your master’s degree, are you considering establishing a headache service?  Yes  No  I have already established a headache service after the master. |
| 21.To what extent has your MHD contributed to your career promotions?  My master's degree has not strengthened my candidacy for promotions. (Skip to question 23)  My master's degree has somewhat strengthened my qualifications for promotions. (Skip to question 23)  My master's degree has significantly strengthened my skillset and made me a more competitive candidate for promotions. (Skip to question 23)  My master's degree has been a key factor in demonstrating my advanced knowledge and abilities, leading to promotions. (Skip to question 23)  Others. (Skip to question 22*)*  22.If 'other,' please kindly share additional details with us. (only if applicable)  **Salary**  23.To what extent has your MHD contributed to an increase in your salary?  My master's degree has not increased my salary.  My master's degree has somewhat increased my salary.  My master's degree has significantly increased my salary.  **Scientific activities**  24.Since graduating with your MHD, have you participated in any scientific activities related to headache  Yes (Skip to question 25)  No (Skip to question 29)  25.Choose the scientific activities related to headache research you have been involved in  Clinical trials  Original research studies  Systematic reviews  Meta-analyses  Other  26.If 'other,' please kindly share additional details with us.  **Your role** in scientific activities related to headache research:  27.If you selected any of the above, please specify your role (select all that apply)  Principal Investigator  Co-Investigator  Research assistant  Data analyst  Author  Reviewer  Other  **Specify your role**  28.If 'other,' please kindly share additional details with us.  **Results of Masters Thesis**  29.Has your master's thesis resulted in a clinical or research study?  Yes  No  Not yet, but I expect to shortly  30.Has your master's thesis been published in a peer-reviewed scientific journal?  Yes  No  Not yet, but I expect to shortly  31.Would you be interested in joining a network specifically for alumni who share your interest in headache medicine?  Yes  No  32.What was your motivation for completing the MHD?   - wanted to gain deeper knowledge and expertise in the field of Headaches - The program aligned well with my career aspirations. - The program offered unique research opportunities that appealed to me. - I was impressed by the program's faculty and reputation. - I wanted to Increase my salary and status. - It is an excellent opportunity for Networking - It was an excellent way to obtain a promotion. - Others   33.If 'other,' please kindly share additional details with us.  34.We would appreciate your suggestions for improving the master for new generations.   - Having access to online or blended learning options would make the program more flexible for my schedule. - I would like the program to offer more opportunities to apply my knowledge to real-world situations, such as case studies or simulations. - I am interested in learning about the impact of emerging technologies on this field. - A mentorship program connecting students with experienced professionals would be a valuable addition. - Developing a global perspective on the field through international case studies or guest speakers would be valuable   35.Please share any additional suggestions for improving the program for future generations. |
